# Supplementary material
Source: HighWire-hosted journal article supplement (https://www.ajevonline.org/highwire/filestream/12333/field_highwire_adjunct_files/0/SupplementalData.pdf)
Supplement: SupplementalData.pdf [file SupplementalData.pdf]

**Supplemental Data for:**

Copp CR, KC AN and Levin AD. 2021. Cluster thinning does not improve fruit composition in grapevine red blotch virus-infected *Vitis vinifera* L. *Am J Enol Vitic* 73:56-66. doi: 10.5344/ajev.2021.21016.

**Supplemental Table 1** Phenology by date and accumulation growing degree days (GDD). GDD are accumulated from 1 April.

|                 | Year | Budbreak | Bloom  | Veraison | Harvest (3309C/RG) <sup>a</sup> |
|-----------------|------|----------|--------|----------|---------------------------------|
| Date            | 2018 | 23 April | 3 June | 10 Aug   | 1 Oct                           |
|                 | 2019 | 16 April | 6 June | 7 Aug    | 25 Sept/2 Oct                   |
|                 | 2020 | 16 April | 2 June | 7 Aug    | 17 Sept/21 Sept                 |
| GDD (base 10°C) | 2018 | 50       | 319    | 1143     | 1608                            |
|                 | 2019 | 21       | 297    | 936      | 1408/1426                       |
|                 | 2020 | 40       | 291    | 945      | 1423/1452                       |

<sup>a</sup>3309C, 3309 Couderc; RG, Riparia Gloire.

**Supplemental Table 2** Treatment and year effects on secondary fruit composition per unit fresh weight at harvest for the rootstocks 3309 Couderc (3309C) and Riparia Gloire (RG). Data are means  $\pm$  1 standard error (n = 4). CON, control irrigation and no thinning; SUPP, 2x control irrigation; THIN, one cluster per shoot; ANOVA, analysis of variance; FW, fresh weight; IRP, iron-reactive phenolics.

| Year/<br>Irrigation | Thinning | Skin IRP (mg/g FW) |                 | Seed IRP (mg/g FW) |                 | Seed tannins (mg/g FW) |                 |
|---------------------|----------|--------------------|-----------------|--------------------|-----------------|------------------------|-----------------|
|                     |          | 3309C              | RG              | 3309C              | RG              | 3309C                  | RG              |
| <b>2018</b>         |          |                    |                 |                    |                 |                        |                 |
| CON                 | CON      | 1.36 $\pm$ 0.14    | 1.85 $\pm$ 0.14 | 3.23 $\pm$ 0.20    | 3.05 $\pm$ 0.19 | 1.70 $\pm$ 0.11        | 1.55 $\pm$ 0.08 |
|                     | THIN     | 1.66 $\pm$ 0.14    | 1.93 $\pm$ 0.14 | 3.74 $\pm$ 0.20    | 3.40 $\pm$ 0.19 | 1.88 $\pm$ 0.11        | 1.19 $\pm$ 0.08 |
| SUPP                | CON      | 1.45 $\pm$ 0.14    | 1.74 $\pm$ 0.14 | 3.59 $\pm$ 0.20    | 2.91 $\pm$ 0.19 | 1.89 $\pm$ 0.11        | 1.48 $\pm$ 0.08 |
|                     | THIN     | 1.93 $\pm$ 0.14    | 2.14 $\pm$ 0.14 | 3.36 $\pm$ 0.20    | 2.39 $\pm$ 0.19 | 1.92 $\pm$ 0.11        | 1.51 $\pm$ 0.08 |
| <b>2019</b>         |          |                    |                 |                    |                 |                        |                 |
| CON                 | CON      | 2.08 $\pm$ 0.14    | 2.16 $\pm$ 0.14 | 1.89 $\pm$ 0.20    | 1.73 $\pm$ 0.19 | 0.90 $\pm$ 0.11        | 0.80 $\pm$ 0.08 |
|                     | THIN     | 1.98 $\pm$ 0.14    | 2.51 $\pm$ 0.14 | 2.19 $\pm$ 0.20    | 2.02 $\pm$ 0.19 | 0.89 $\pm$ 0.11        | 0.85 $\pm$ 0.08 |
| SUPP                | CON      | 1.81 $\pm$ 0.14    | 2.17 $\pm$ 0.14 | 2.11 $\pm$ 0.20    | 2.07 $\pm$ 0.19 | 0.95 $\pm$ 0.11        | 0.90 $\pm$ 0.08 |
|                     | THIN     | 1.76 $\pm$ 0.14    | 2.39 $\pm$ 0.14 | 1.94 $\pm$ 0.20    | 2.19 $\pm$ 0.19 | 0.85 $\pm$ 0.11        | 0.85 $\pm$ 0.08 |
| <b>2020</b>         |          |                    |                 |                    |                 |                        |                 |
| CON                 | CON      | 2.39 $\pm$ 0.14    | 2.61 $\pm$ 0.14 | 4.62 $\pm$ 0.20    | 3.42 $\pm$ 0.19 | 1.58 $\pm$ 0.11        | 1.14 $\pm$ 0.08 |
|                     | THIN     | 2.39 $\pm$ 0.14    | 2.54 $\pm$ 0.14 | 4.51 $\pm$ 0.20    | 3.50 $\pm$ 0.19 | 1.49 $\pm$ 0.11        | 1.12 $\pm$ 0.08 |
| SUPP                | CON      | 1.59 $\pm$ 0.14    | 2.33 $\pm$ 0.14 | 3.75 $\pm$ 0.20    | 3.23 $\pm$ 0.19 | 1.24 $\pm$ 0.11        | 1.05 $\pm$ 0.08 |
|                     | THIN     | 1.73 $\pm$ 0.14    | 2.86 $\pm$ 0.14 | 4.07 $\pm$ 0.20    | 3.67 $\pm$ 0.19 | 1.36 $\pm$ 0.11        | 1.15 $\pm$ 0.08 |
| <b>ANOVA</b>        |          |                    |                 |                    |                 |                        |                 |
| Irrigation (I)      |          | 0.042              | 0.965           | 0.211              | 0.478           | 0.568                  | 0.326           |
| Thinning (T)        |          | 0.151              | 0.014           | 0.495              | 0.390           | 0.747                  | 0.355           |
| Year (Y)            |          | <0.001             | <0.001          | <0.001             | <0.001          | <0.001                 | <0.001          |
| I * T               |          | 0.481              | 0.119           | 0.397              | 0.434           | 0.960                  | 0.157           |
| I * Y               |          | <0.001             | 0.787           | 0.015              | 0.005           | 0.057                  | 0.313           |
| T * Y               |          | 0.055              | 0.905           | 0.942              | 0.291           | 0.527                  | 0.104           |
| I * T * Y           |          | 0.928              | 0.047           | 0.047              | 0.043           | 0.402                  | 0.051           |
